# Supplementary material
Source: PubMed Central journal article supplement (PMC4260558)
Supplement: pnas.201413725SI.pdf [file pnas.201413725SI.pdf]

# Supporting Information

Baeyens et al. 10.1073/pnas.1413725111

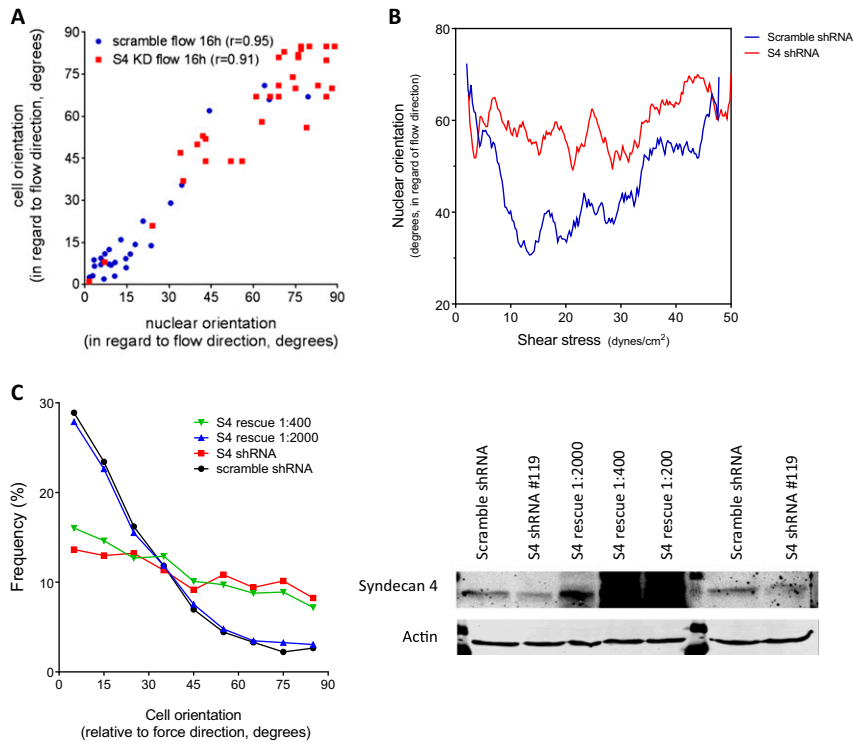

**Fig. S1.** (A) Correlation between cell orientation and nucleus orientation in HUVEC cells transfected with scrambled or S4 shRNA. (B) A linear gradient of shear stress ( $2\text{--}50\text{ dynes}\cdot\text{cm}^{-2}$ ) was applied for 16 h across slides in a modified parallel plate chamber designed according to Usami and colleagues (1). Adjacent microscopic pictures were taken across the chamber, and the average nuclear orientation was quantified for each picture and reported on the graph. Data were smoothed with a LOWESS fit function. (C) Rescue of S4 knockdown (shRNA #121) by adenoviral reexpression of rat S4. Two dilutions of the adenovirus were used: 1/400 and 1/2,000. Nuclear orientation was quantified to characterize cell orientation in regard to flow direction ( $n > 3,000$  cells by condition). Western blot of S4 and actin as a loading control; all samples were sheared for 16 h.

1. Usami S, Chen HH, Zhao Y, Chien S, Skalak R (1993) Design and construction of a linear shear stress flow chamber. *Ann Biomed Eng* 21(1):77–83.
